# Supplementary material for: Iloprost requires the Frizzled-9 receptor to prevent lung cancer
Source: PubMed Central journal article supplement — iScience. 2022 May 23;25(6):104442. doi: 10.1016/j.isci.2022.104442 (PMC9189122; doi:10.1016/j.isci.2022.104442), 2022-05-23
Supplement: mmc1.pdf [file mmc1.pdf]

iScience, Volume 25

## **Supplemental information**

### **Iloprost requires the Frizzled-9 receptor to prevent lung cancer**

**Kayla Sompel, Lori D. Dwyer-Nield, Alex J. Smith, Alamelu Elango, Don S. Backos, Bicheng Zhang, James Gross, Kristina Ternyak, Jennifer L. Matsuda, Katrina Kopf, Robert L. Keith, and Meredith A. Tennis**

## Supplemental Table and Figures

Supplemental Table S1. **Ki67 analysis in mouse lung tissue, related to Figure 1.**

| <b>Group</b> | <b>Tumor Area (mm<sup>2</sup>)</b> | <b>Ki67+ Cells</b> | <b>Ratio (Ki67+/mm<sup>2</sup>)</b> |
|--------------|------------------------------------|--------------------|-------------------------------------|
| <b>WUS</b>   | 0.24                               | 2                  | 8.33                                |
|              | 0.18                               | 2                  | 11.1                                |
|              | 0.39                               | 1                  | 2.56                                |
|              | 0.275                              | 5                  | 18.18                               |
| <b>WUI</b>   | 0.85                               | 3                  | 3.52                                |
|              | No Tumor                           | 0                  | 0                                   |
|              | No tumor                           | 0                  | 0                                   |
| <b>FUS</b>   | 0.455                              | 7                  | 15.38                               |
|              | 0.96                               | 4                  | 4.17                                |
|              | 0.32                               | 0                  | 0                                   |
| <b>FUI</b>   | 0.88                               | 8                  | 9.09                                |
|              | 0.695                              | 4                  | 5.75                                |
|              | 0.61                               | 3                  | 4.92                                |
|              | 0.75                               | 3                  | 4.00                                |

A

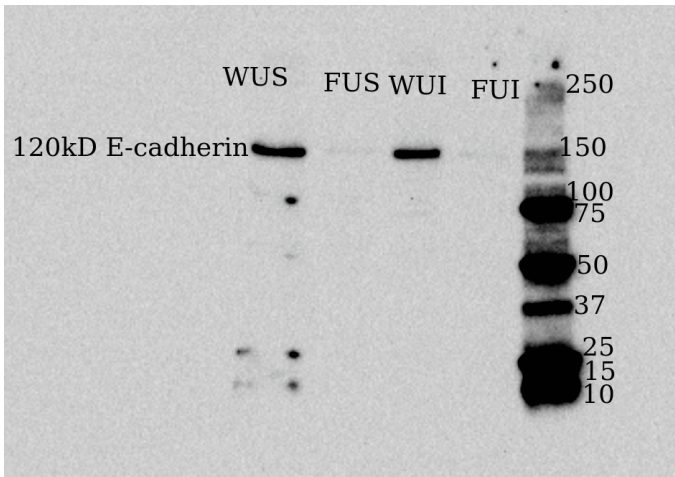

B

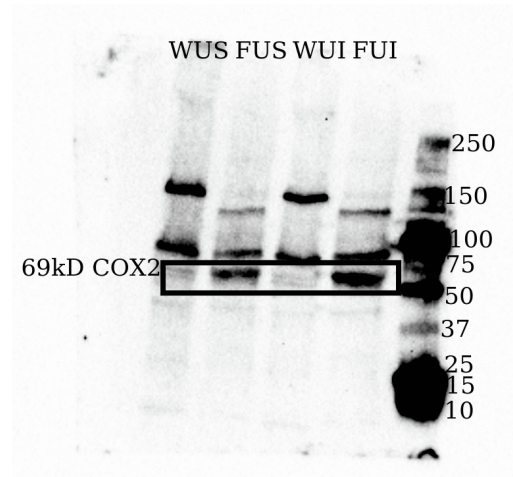

C

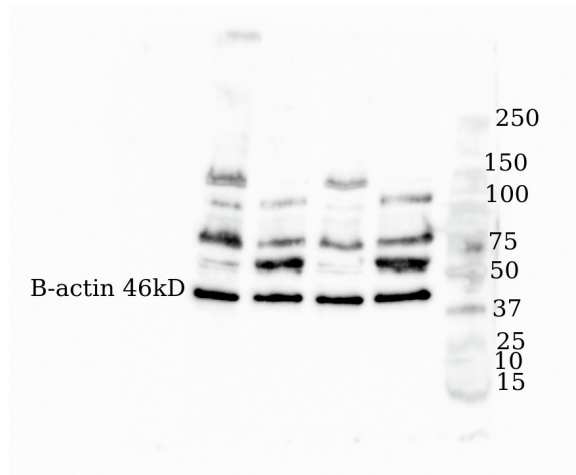

Supplemental Figure S1. **Full western blot images, related to Figure 3.** Western blots with molecular marker for (A) Ecadherin, (B) COX2, and (C)  $\beta$ -actin. WUS, wild type urethane saline; FUS, *Fzd9*<sup>-/-</sup> urethane saline; WUI, wild type urethane iloprost; FUI, *Fzd9*<sup>-/-</sup> urethane iloprost. Molecular marker is Protein Plus Precision Kaleidoscope (BioRad).

A

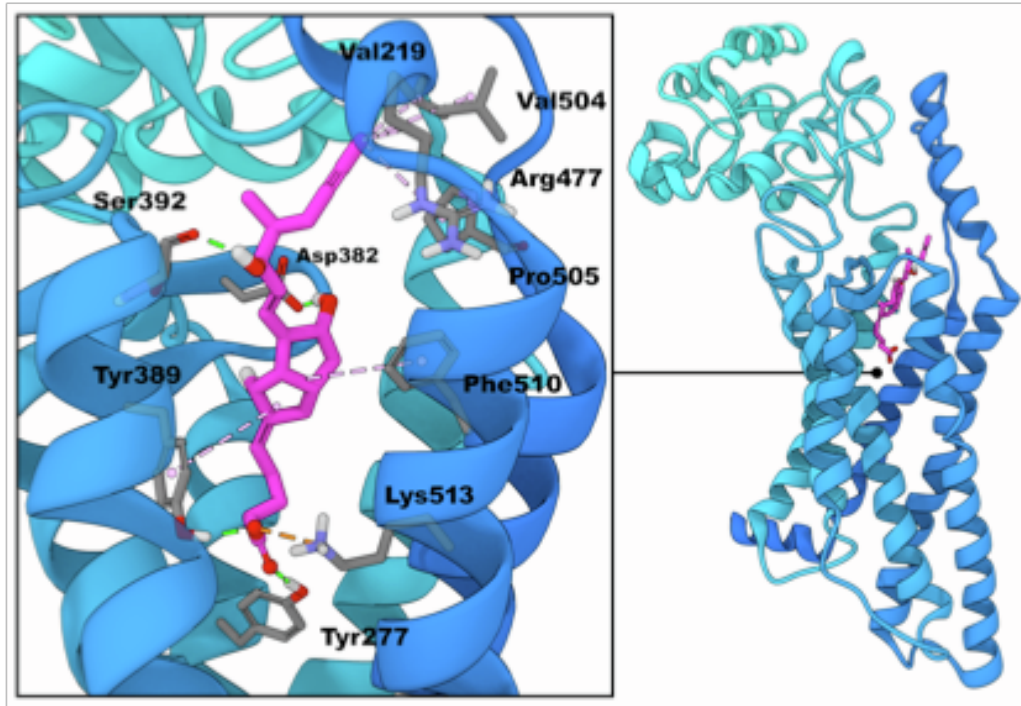

B

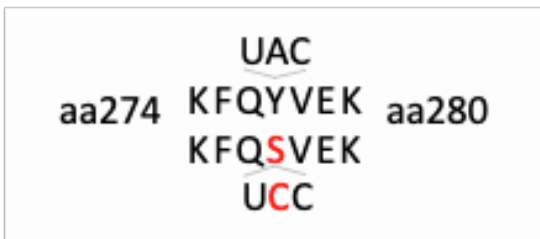

C

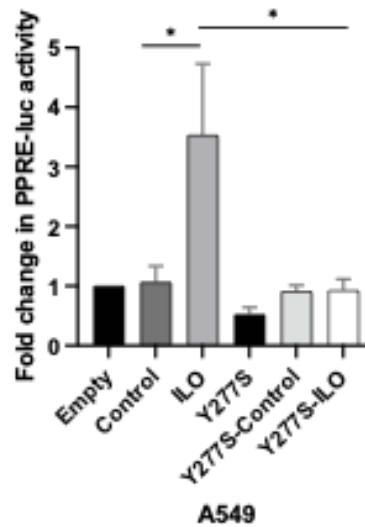

D

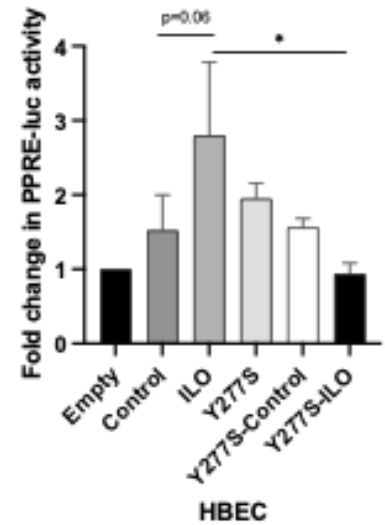

Supplemental Figure S2. **Iloprost is predicted to bind FZD<sub>9</sub>, related to STAR Methods.** A) The predicted binding orientation of iloprost (magenta sticks) in the ligand binding site of human FZD<sub>9</sub> (ribbons colored from the N-terminus (Cyan) to the C-terminus (Blue)) with interacting residues shown as gray sticks. Non-bond interactions are shown as dashed lines: hydrogen bonds (green), electrostatic/salt-bridge (orange), and hydrophobic (pink). B) Sequence of FZD<sub>9</sub> site directed mutation. C-D) Fold change in PPRE-luciferase activity after transfection with a mutant FZD<sub>9</sub> plasmid and treatment with 10uM iloprost in (C) A549 or (D) HBEC cell lines (N=3). Transfections were conducted in triplicate with vehicle (Control) and empty plasmid (Empty) controls. ILO, iloprost; Y277S, mutant FZD<sub>9</sub> plasmid. Data are represented as mean ± SEM. Student's t-test was used to measure significance. \*p<0.05
